# Supplementary material for: Fungal Traits Important for Soil Aggregation
Source: Front Microbiol. 2020 Jan 9;10:2904. doi: 10.3389/fmicb.2019.02904 (PMC6962133; doi:10.3389/fmicb.2019.02904)
Supplement: Supplementary file 2 [file Data_Sheet_2.xlsx]

## Sheet: Sheet3
Supplementary Data
Title: Fungal traits important for soil aggregation
(How to be an effective aggregator)
Anika Lehmann a, b, Weishuang Zheng c, Masahiro Ryo a, b, Katharina Soutschek a, Julien Roy a, b, Rebecca Rongstock a, Stefanie Maaß b, d, Matthias C. Rillig a, b
a Freie Universität Berlin, Institut für Biologie, Plant Ecology, Altensteinstr. 6, D- 14195 Berlin, Germany
b Berlin-Brandenburg Institute of Advanced Biodiversity Research, D-14195 Berlin, Germany
c PKU-HKUST ShenZhen-Hong Kong Institution, Shenzhen 518057, China
d Universität Potsdam, Institut für Bioologie und Biochemie, Plant Ecology and Nature Conservation, Am Mühlenberg 3, D-14476 Potsdam, Germany

## Sheet: Supplementary Table S6
Supplementary Table S6. Trait data and taxonomic information of the investigated 31 fungal strains
strain ID	SAF	HSA	HLs	Db	L	BA	D	IL	Kr	PT	Den	HPB	Lac	Leu	Cel	Pho	Phylum	Order	Taxonomic identification
RLCS01	4.62727	0.911816	13.8779	1.45414	0.472262	86.038	4.1348	61.2118	372.762	27.86	0.0198427	19.1667	0.0426914	7.08868	0.0478401	0.383967	Mucoromycota	Mucorales	Mucor fragilis
RLCS02	6.84546	2.02092	13.2814	1.57856	0.693457	69.432	4.14204	110.981	247.38	13.3767	0.057348	17.5	0.0148007	1.21411	0.00135192	0.971651	Mucoromycota	Mortierellales	Mortierella elongata strain 2
RLCS03	7.67273	1.49908	8.0937	1.4909	0.5741	67.7552	5.5858	105.612	220.037	32.0515	0.0458646	0	0.016432	2.81525	0.00181408	0.461701	Mucoromycota	Mortierellales	Mortierella alpina strain 1
RLCS04	5.50909	1.37942	12.7405	1.49896	0.587754	73.2248	4.74592	86.0316	215.152	21.7205	0.0433141	0	0.0192681	1.42276	0.00142955	0.297717	Mucoromycota	Mortierellales	Mortierella exigua
RLCS05	6.54545	1.03699	8.49596	1.39365	0.68321	69.9431	6.38568	222.512	215.152	18.1738	0.024524	0	0.0707326	1.99589	0.0700055	1.70167	Ascomycota	Hypocreales	Fusarium sp.
RLCS06	5.05455	1.41089	9.01785	1.52738	0.562933	40.8537	4.39184	72.06	198.463	5.5994	0.0421121	40	0.0329343	0.640152	0.0271264	0.269729	Ascomycota	Sordariales	Chaetomium angustispirale
RLCS07	4.93636	1.23839	11.4782	1.47297	0.593275	67.0451	4.5664	39.6095	196.822	39.9031	0.0576262	51.6667	1.44653	0.0901589	0.104476	0.167655	Ascomycota	Xylariales	Amphisphaeriaceae strain 1
RLCS08	7.51818	1.07262	10.6043	1.424	0.556646	48.105	5.55008	192.113	183.005	17.2726	0.0633472	9.16667	0.0783999	0.555451	0.0449994	0.165834	Ascomycota	Hypocreales	Gibberella tricincta
RLCS09	6.00909	0.544892	11.3672	1.26377	0.470092	42.2879	5.47936	452.839	178.578	21.7281	0.0444903	49.1667	4.18696	1.41395	0.0261191	2.44647	Basidiomycota	Polyporales	Trametes versicolor
RLCS10	10.0455	0.593442	12.6572	1.27131	0.515002	76.1533	6.46164	186.296	152.369	10.7875	0.0879394	13.3333	1.5105	0.676738	0.0767878	0.0705404	Ascomycota	Pleosporales	Alternaria alternata
RLCS11	4.05455	1.54473	8.56705	1.53055	0.575425	64.7871	4.74216	92.659	148.129	24.6368	0.033761	49.1667	0.0469618	2.08992	0.00450616	0.957452	Mucoromycota	Mortierellales	Mortierella alpina strain 2
RLCS12	6.08182	1.14879	6.87999	1.51257	0.630927	64.6219	3.70572	65.8902	129.696	20.2552	0.045599	35.8333	3.46418	1.15293	0.0652103	0.141858	Ascomycota	Pleosporales	Didymellaceae strain 1
RLCS13	5.9	1.04435	7.76773	1.40115	0.576554	45.7679	6.15768	178.627	125.452	15.6613	0.0640812	7.5	2.2739	1.58965	0.0403269	0.362449	Ascomycota	Hypocreales	Fusarium solani
RLCS14	6.20909	0.975012	10.2368	1.40362	0.539131	61.8226	5.92688	165.212	117.949	31.8357	0.067589	14.1667	0.0201974	0.230662	0.0145037	0.872963	Ascomycota	Pleosporales	Didymellaceae strain 2
RLCS15	5.08182	1.66019	16.125	1.50621	0.547171	63.3549	5.90996	78.3659	98.5192	16.2567	0.0521637	24.1667	0.022068	1.48594	0.00137295	1.14502	Mucoromycota	Mortierellales	Mortierella elongata strain 1
RLCS16	6.53636	0.49172	10.9858	1.23939	0.473594	26.5454	5.90596	316.184	84.5833	18.3708	0.0189095	60	3.30828	4.28359	0.0770505	0.108537	Basidiomycota	Agaricales	Pleurotus pulmonarius
RLCS17	7.30909	0.800014	19.9811	1.38969	0.584775	44.0262	4.3366	160.025	79.4843	16.849	0.0811604	45.8333	2.6795	1.43609	0.0168005	0.0839346	Basidiomycota	Agaricales	Clitopilus sp.
RLCS18	9.33636	1.12081	8.69015	1.43237	0.673196	58.7773	4.94484	157.067	78.0967	23.8458	0.061604	27.5	0.0525185	0.604028	0.033705	0.504744	Ascomycota	Hypocreales	Gibberella sp.
RLCS19	3.7	0.750163	11.9706	1.48213	0.50745	77.3675	2.73812	43.3911	70.4725	11.0507	0.0716256	26.6667	0.0321249	3.58247	0.0138361	0.237486	Mucoromycota	Umbelopsidales	Umbelopsis isabellina
RLCS20	6.07273	1.13055	9.24499	1.45205	0.6245	37.8964	4.96988	64.4741	55.2301	19.2375	0.0669573	42.5	0.0225078	1.701	0.032058	0.495802	Ascomycota	Hypocreales	Purpureocillium lilacinum
RLCS21	6.07273	1.10446	9.74434	1.46861	0.726662	51.8393	3.96084	127.458	44.7142	95.6104	0.126794	0	1.35143	1.73325	0.124637	1.26214	Ascomycota	Pleosporales	Pyrenochaetopsis leptospora
RLCS22	10.0091	0.510079	7.72612	1.27009	0.520633	61.9902	4.22192	127.844	44.6071	48.4906	0.144019	15.8333	0.521108	0.451904	0.0450633	0.448085	Ascomycota	Pleosporales	Paraphoma chrysanthemicola
RLCS23	7.7	1.35463	11.0898	1.51062	0.609606	50.6535	4.83664	86.6514	42.5742	10.0485	0.0800258	50	3.28908	0.813798	0.127753	0.369399	Ascomycota	Hypocreales	Stachybotryaceae strain 1
RLCS24	6.70909	1.61968	7.4487	1.56107	0.653929	59.1513	3.99192	124.855	37.5568	28.056	0.0737566	54.1667	0.131426	0.624961	0.0448003	1.53634	Ascomycota	Hypocreales	Metarhizium marquandii
RLCS25	8.37273	1.25115	8.00354	1.48367	0.642452	41.3904	4.53192	102.887	31.0579	16.5119	0.0877434	0	0.0934906	1.00491	0.0415627	0.84785	Ascomycota	Hypocreales	Hydropisphaera sp.
RLCS26	8.87273	1.13502	10.4934	1.487	0.605933	56.2731	4.3002	122.115	29.9745	14.9229	0.116704	0	2.78596	0.837606	0.0533203	0.0775441	Ascomycota	Helotiales	Tetracladium marchalianum
RLCS27	5.41818	1.22295	9.78595	1.42335	0.519309	63.3229	5.43448	184.004	26.8043	10.2917	0.107349	39.1667	4.53529	3.29759	0.0171388	0.229396	Ascomycota	Sordariales	Thielavia inaequalis
RLCS28	10.3091	0.927226	7.63596	1.44821	0.622927	44.0048	4.01844	64.9963	25.712	10.7218	0.122474	23.3333	0.0133682	0.645784	0.0535793	0.788142	Ascomycota	Helotiales	Tricladium sp.
RLCS29	5.07273	0.588895	10.5489	1.30016	0.538963	60.7999	5.0704	185.325	23.2409	35.5521	0.0361967	0	10.3753	0.130886	0.0434639	0.0195008	Basidiomycota	Agaricales	Macrolepiota excoriata
RLCS30	8.05454	1.05804	10.424	1.44895	0.610237	43.7612	4.48484	277.829	20.7022	123.679	0.10238	0	0.0190423	0.64982	0.0349948	0.00464073	Ascomycota	Chaetothyriales	Exophiala equina
RLCS31	6.31818	0.860575	8.48902	1.40146	0.565698	60.2023	4.50428	106.294	20.2015	63.3021	0.160357	0	0.631824	0.250039	0.0348421	0.330605	Ascomycota	Chaetothyriales	Cyphellophora sp.

## Sheet: meta data
TreeID	ID shortcut
Fungal strain	phylogenetic name of fungal strains
Order	order
Phylum	phylum
SAF	soil aggregate formation capability (control=3.52%), in %
HLs	hyphal length in soil (including background of 4.65 m/g) , m * g-1 soil
HSA	hyphal surface area, µm²
Db	fractal dimension: box counting dimension, uniteless
L	fractal dimension: lacunarity, uniteless
BA	branching angle, °
D	diamater, µm
IL	internodal length, µm
Kr	colony extension rate of single colonies on PDA, µm * h-1
PT	palatability, no. of fecal pellets per individum
Den	biomass density, mg * cm-2
HPB	hydrophobicity of fungal tissue, %
Lac	laccase activity, U * mg-1
Leu	leucine aminopeptidase activity, U * mg-1
Cel	cellobiohydrolae activity, U * mg-1
Pho	acid phosphatase activity, U * mg-1
